# Supplementary material
Source: publisher figshare collection journal article supplement (https://tandf.figshare.com/articles/dataset/_/20346295)
Supplement: Supplementary file 1 [file 1]

## S2. Effect sizes and power

Table S2.1 Statistics of main effect of Light condition for all parameters

| Dependent variable            | $F$                 | $p$     | $f^2$                       |
|-------------------------------|---------------------|---------|-----------------------------|
| <b>Vitality</b>               | $F_{2,74} = 0.50$   | 0.61    | < 0.01                      |
| <b>KSS</b>                    | $F_{2,77} = 0.23$   | 0.79    | < 0.01                      |
| <b>M<sub>RT</sub></b>         | $F_{2,46} = 2.53$   | 0.09    | < 0.01                      |
| <b>M<sub>RT10%slow</sub></b>  | $F_{2,70} = 3.20$   | 0.05    | < 0.01                      |
| <b>M<sub>RT10%fast</sub></b>  | $F_{2,73} = 0.38$   | 0.69    | < 0.01                      |
| <b>SD<sub>RT</sub></b>        | $F_{2,71} = 2.37$   | 0.10    | 0.01                        |
| <b>CV<sub>RT</sub></b>        | $F_{2,66} = 1.43$   | 0.25    | 0.01                        |
| <b>PVT motivation</b>         | $F_{2,61} = 0.57$   | 0.57    | < 0.01                      |
| <b>Mean SCL</b>               | $F_{2,66} = 2.04$   | 0.14    | < 0.01                      |
| <b>Pupil Power</b>            | $F_{2,62} = 175.68$ | < 0.001 | 0.33                        |
| <b>PUI</b>                    | $F_{2,49} = 197.33$ | < 0.001 | 0.42                        |
| <b>SD<sub>PD</sub></b>        | $F_{2,66} = 179.64$ | < 0.001 | 0.36                        |
| <b>Calm</b>                   | $F_{2,42} = 3.39$   | 0.04    | < 0.01                      |
| <b>Happy</b>                  | $F_{2,68} = 0.36$   | 0.70    | < 0.01                      |
| <b>Comfort<sub>v</sub></b>    | $F_{2,79} = 13.37$  | < 0.001 | 0.03                        |
| <b>Sensation<sub>VI</sub></b> | $F_{2,73} = 98.56$  | < 0.001 | 0.21                        |
| <b>Sensation<sub>VC</sub></b> | $F_{2,80} = 39.47$  | < 0.001 | 0.23                        |
|                               | $F$                 | $p$     | $R^2_{\text{fixed-effect}}$ |
| <b>Light Appraisal</b>        | $F_{2,80} = 13.45$  | < 0.001 | 0.13                        |
| <b>HES factor</b>             | $F_{2,80} = 2.73$   | 0.07    | 0.02                        |

$F$ : F-value,  $p$ : p-value and  $f^2$ : Cohen's  $f^2$

Table L.2 Power for mood and comfort related parameters

| Dependent variable            | Main effect condition | Dim vs Intermittent | Dim vs Bright | Intermittent vs Bright |
|-------------------------------|-----------------------|---------------------|---------------|------------------------|
| <b>Calm</b>                   | 17.7 %                | 3.1 %               | 21.2 %        | 7.6 %                  |
| <b>Happy</b>                  | 4.6 %                 | 4.1 %               | 4.8 %         | 1.3 %                  |
| <b>Comfort<sub>v</sub></b>    | 69.4 %                | 44.9 %              | 81.0%         | 2.5 %                  |
| <b>Sensation<sub>vi</sub></b> | 100 %                 | 3.6 %               | 100 %         | 98 %                   |
| <b>Sensation<sub>vc</sub></b> | 98.9 %                | 0.4 %               | 99.2 %        | 93.6 %                 |
| <b>Light Appraisal</b>        | 97.0 %                | 97.6 %              | 89.8 %        | 4.2 %                  |
| <b>HES factor</b>             | 27.7 %                | 1.9 %               | 27.0 %        | 21.0 %                 |
