# Supplementary material
Source: publisher figshare collection journal article supplement (https://tandf.figshare.com/articles/dataset/_/20346295)
Supplement: Supplementary file 2 [file 1]

#### S4. KSS score during the baseline

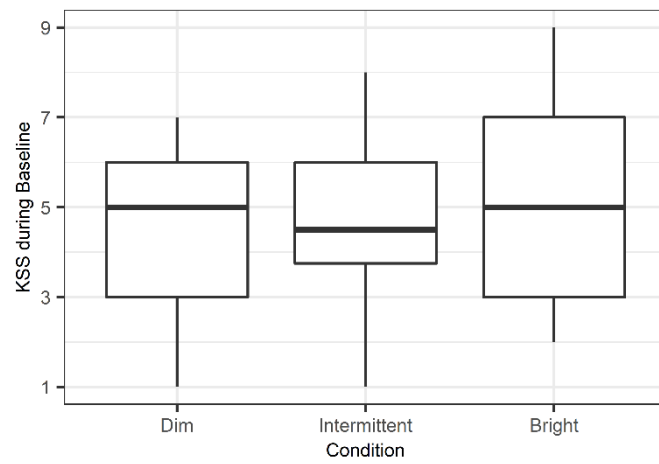

Figure S4.1 Boxplot per condition representing the KSS score during the baseline
